# Supplementary material for: Discrimination between NSIP- and IPF-Derived Fibroblasts Based on Multi-Parameter Characterization of Their Growth, Morphology and Physic-Chemical Properties
Source: Int J Mol Sci. 2022 Feb 15;23(4):2162. doi: 10.3390/ijms23042162 (PMC8880018; doi:10.3390/ijms23042162)
Supplement: Supplementary file 1 [file ijms-23-02162-s001.zip › ijms-1585368-supplementary.pdf]

**Discrimination between NSIP- and IPF-derived fibroblasts based on multi-parameter characterization of their morphology, growth and physic-chemical properties.**

**Barbara Orzechowska<sup>1</sup>, Kamil Awsiuk<sup>2,3</sup>, Dawid Wnuk<sup>4</sup>, Joanna Pabijan<sup>1</sup>, Tomasz Stachura<sup>5</sup>, Jerzy Soja<sup>5</sup>, Krzysztof Śladek<sup>5</sup>, Joanna Raczkowska<sup>2,3\*</sup>**

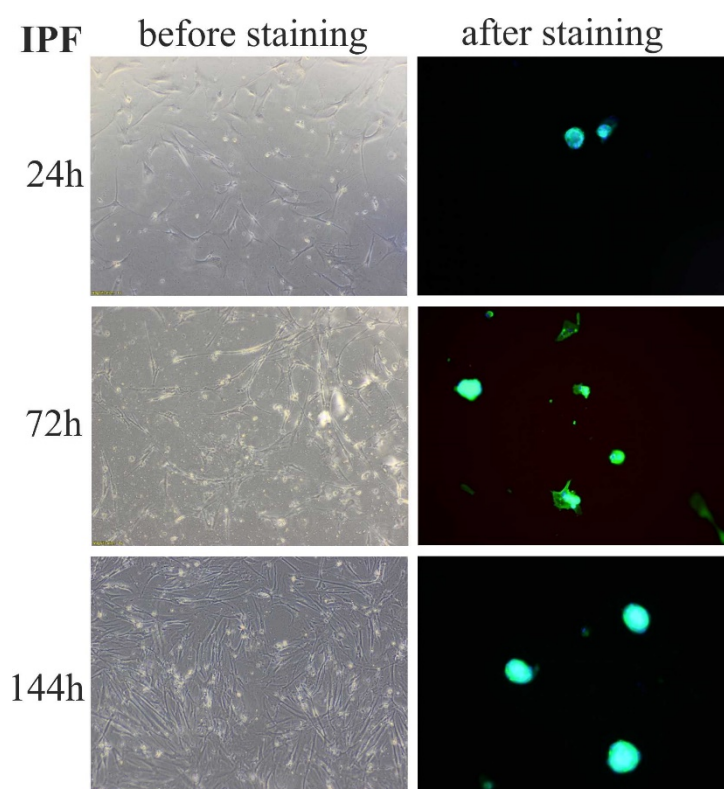

**Figure S1.** Fibroblasts cultured on PDMS D substrate. Optical image before staining (a) and fluorescence micrographs after staining (b), showing detachment of cells during staining procedure.
